# Supplementary material for: Continuous flow nano-technology: manipulating the size, shape, agglomeration, defects and phases of silver nano-particles
Source: Royal Society of Chemistry journal article supplement (doi:10.1039/b709524d), 2007-01-01

## Supporting Information

(A): UV-Vis absorption spectra of suspensions of silver nano-particles recorded for different reagent concentrations. (B): ATR-FTIR spectra of soluble starch and silver nano-particles capped with starch (0.03 wt%).

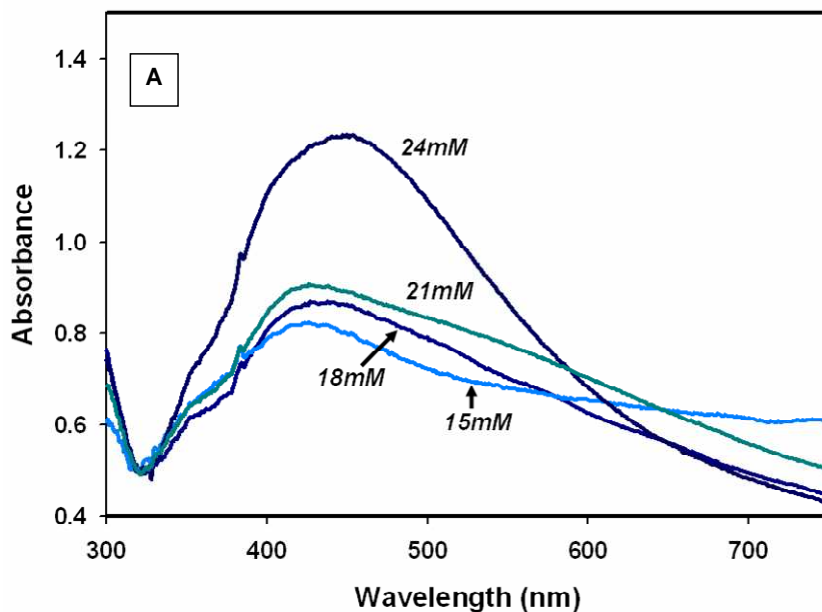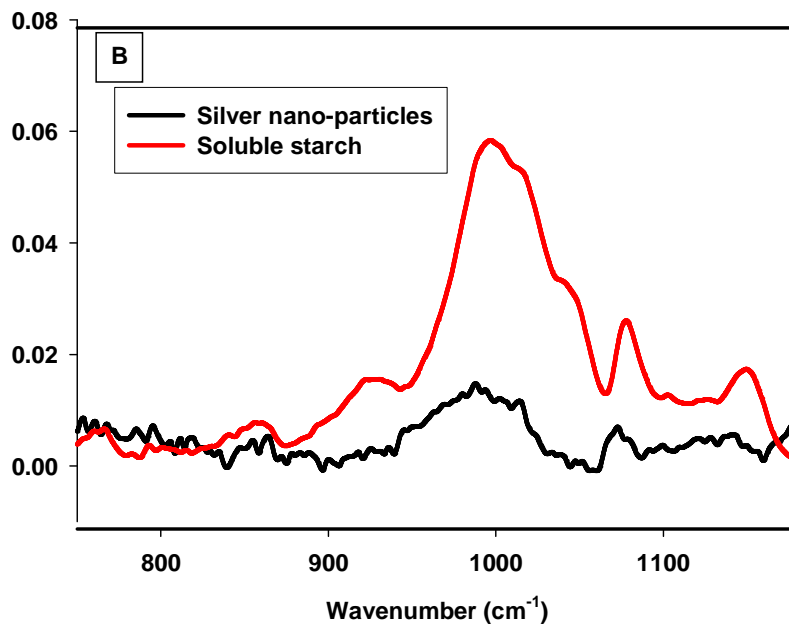

Supplement: b709524d.pdf [file b709524d.pdf]
